# Respiratory syncytial virus induces hypermetabolism in pediatric airways.

Svetlana Rezinciuc<sup>1</sup>, Lavanya Bezavada<sup>1</sup>, Azadeh Bahadoran<sup>1</sup>, **Jesse F. Ingels**<sup>1</sup>, Young-Yin Kim<sup>2</sup>, Stephania A. Cormier<sup>3</sup>, Barry L. Shulkin<sup>4</sup>, John P. Devincenzo<sup>2</sup>, Heather S. Smallwood<sup>5</sup>\*

<sup>1</sup>University of Tennessee Health Science Center (UTHSC), United States, <sup>2</sup>Le Bonheur Children's Hospital, United States, <sup>3</sup>Louisiana State University, United States, <sup>4</sup>St. Jude Children's Research Hospital, United States, <sup>5</sup>Department of Pediatrics, University of Tennessee Health Sciences Center, United States

---

### *Conflict of interest statement*

The authors declare that the research was conducted in the absence of any commercial or financial relationships that could be construed as a potential conflict of interest

### *Author contribution statement*

S.R. and L.B NPA metabolite and cell sample preparation, drug/cell titrations, XFe96 assays; Y.Y.K. qPCR; S.C. URC characterization; J.P.D. clinical coordination and NPA collection; B.L.S. PET scan analysis, retrospective clinical study; H.S.S. data analysis, experiment coordination, and manuscript writing.

### *Keywords*

RSV (respiratory syncytial virus), Metabolism, pediatric, Glycolysis, OXPHOS = oxidative phosphorylation, viral infection, Bioenergetics, Metabolomics, Infant

### *Abstract*

Word count: 227

To determine whether respiratory syncytial virus (RSV) regulates human metabolism, we used positron emission tomography (PET) of patient lungs along with bioenergetics and metabolomics of patient upper airway cells and fluids. We previously found a significant negative monotonic relationship between glucose uptake and respiratory viral infection in 20 pediatric patients (e.g., 70% of infected patients had glucose uptake within 0-3 days). In our recent study, 3 out of 4 patients positive for glucose uptake at later times (>5 days) were positive for RSV infection. At present, the bioenergetics of upper respiratory cells (URCs) from nasal pharyngeal aspirates have not been investigated, and in vitro studies indicate RSV reduces metabolism in cell lines. To define metabolic changes in RSV-infected pediatric patients, we acquired fresh aspirates from 6 pediatric patients. Immediately following aspiration of URCs, we measured the two major energy pathways using an XFe flux analyzer. Glycolysis and mitochondrial respiration were significantly increased in URCs from RSV-infected patients, and mitochondrial respiration was operating at near maximal levels, resulting in loss of cellular capacity to increase respiration with impaired coupling efficiency. Metabolomics analysis of metabolites flushed from the upper airways confirmed a significant increase in TCA cycle intermediates. Taken together, these studies demonstrate RSV induces significant hypermetabolism in pediatric patients' lungs and respiratory tract. Thus, hypermetabolism is a potential anti-viral drug target and reveals RSV can regulate human metabolism.

### *Contribution to the field*

Metabolic changes in humans in response to viral infection are largely unknown. In this brief clinical report, we find metabolism is markedly increased in live upper respiratory cells from infants infected with respiratory syncytial virus (RSV) concomitant to changes in metabolites in their upper airway fluids. This sheds light on viral induced hypermetabolism in the airways and offers potential biomarkers for RSV. In addition, this identifies potential therapeutic targets for host directed therapies of aberrant metabolism in RSV. This work has clinical impact as biomarkers and therapeutics for RSV are needed for this pervasive virus that causes infections with long term consequence for some children. Further, advancements in molecular mechanisms underpinning RSV infection biology are constrained by the difficulties in translating model systems to humans as well as relating human studies in adults to infants.

### *Funding statement*

This research was supported by Le Bonheur Children's Hospital and the Children's Foundation Research Institute <https://www.lebonheur.org/research-and-education/research/> (H.S.).

### *Ethics statements*

#### *Studies involving animal subjects*

Generated Statement: No animal studies are presented in this manuscript.

#### *Studies involving human subjects*

Generated Statement: The studies involving human participants were reviewed and approved by UTHSC Institutional Review Board (IRB). Written informed consent to participate in this study was provided by the participants' legal guardian/next of kin.

#### *Inclusion of identifiable human data*

Generated Statement: No potentially identifiable human images or data is presented in this study.

### *Data availability statement*

Generated Statement: The datasets generated for this study are available on request to the corresponding author.

# Respiratory Syncytial Virus Infections Induce Hypermetabolism in Pediatric Upper Airways

Svetlana Rezinciuc<sup>1</sup>, Lavanya Bezavada<sup>1</sup>, Azadeh Bahadoran<sup>1</sup>, Jesse F. Ingels<sup>2</sup>, Young-Yin Kim<sup>1</sup>, Stephania A. Cormier<sup>3</sup>, John P. Devincenzo<sup>1</sup>, Barry L. Shulkin<sup>4</sup>, and Heather S. Smallwood<sup>1\*</sup>

<sup>1</sup>Department of Pediatrics, University of Tennessee Health Science Center, Memphis, Tennessee, USA

<sup>2</sup>Department of Genetics, Genomics, and Informatics, University of Tennessee Health Science Center, Memphis, Tennessee, USA

<sup>3</sup> Department of Biological Sciences, Louisiana State University, and Department of Comparative Biomedical Sciences, Louisiana State University School of Veterinary Medicine, Baton Rouge Louisiana, USA

<sup>4</sup> Department of Diagnostic Imaging, St. Jude Children's Research Hospital, Memphis, Tennessee, USA

## \*Correspondence:

Heather S. Smallwood, PhD  
hsmallwo@uthsc.edu

**Keywords: (Min.5-Max. 8): virus, infection, metabolism, RSV, pediatric, respiratory infection**

**Running title: RSV Induced Hypermetabolism in Upper Airways**

32 **Abstract**

33

34 To determine whether respiratory syncytial virus (RSV) regulates human metabolism, we  
35 used positron emission tomography (PET) of patient lungs along with bioenergetics and  
36 metabolomics of patient upper airway cells and fluids. We previously found a significant  
37 negative monotonic relationship between glucose uptake and respiratory viral infection in  
38 20 pediatric patients (e.g., 70% of infected patients had glucose uptake within 0–3 days).  
39 In our recent study, 3 out of 4 patients positive for glucose uptake at later times (>5 days)  
40 were positive for RSV infection. At present, the bioenergetics of upper respiratory cells  
41 (URCs) from nasal pharyngeal aspirates have not been investigated, and *in vitro* studies  
42 indicate RSV reduces metabolism in cell lines. To define metabolic changes in RSV-  
43 infected pediatric patients, we acquired fresh aspirates from 6 pediatric patients.  
44 Immediately following aspiration of URCs, we measured the two major energy pathways  
45 using an XFe flux analyzer. Glycolysis and mitochondrial respiration were significantly  
46 increased in URCs from RSV-infected patients, and mitochondrial respiration was  
47 operating at near maximal levels, resulting in loss of cellular capacity to increase  
48 respiration with impaired coupling efficiency. Metabolomics analysis of metabolites  
49 flushed from the upper airways confirmed a significant increase in TCA cycle  
50 intermediates. Taken together, these studies demonstrate RSV induces significant  
51 hypermetabolism in pediatric patients' lungs and respiratory tract. Thus, hypermetabolism  
52 is a potential anti-viral drug target and reveals RSV can regulate human metabolism.

53

54

55 Contributions to the field:

56 Metabolic changes in humans in response to viral infection are largely unknown. In this  
57 brief clinical report, we find metabolism is markedly increased in live upper respiratory  
58 cells from infants infected with respiratory syncytial virus (RSV) concomitant to changes  
59 in metabolites in their upper airway fluids. This sheds light on viral induced  
60 hypermetabolism in the airways and offers potential biomarkers for RSV. In addition, this  
61 identifies potential therapeutic targets for host directed therapies of aberrant metabolism  
62 in RSV. This work has clinical impact as biomarkers and therapeutics for RSV are needed  
63 for this pervasive virus that causes infections with long term consequence for some  
64 children. Further, advancements in molecular mechanisms underpinning RSV infection  
65 biology are constrained by the difficulties in translating model systems to humans as well  
66 as relating human studies in adults to infants (Mestas and Hughes, 2004; Papin et al.,  
67 2013).

68

69

70

## 71 1 Introduction

72

73 Respiratory syncytial virus (RSV) infects 70% of infants by 12 months and reemerges as  
74 a serious lower respiratory tract illness in the elderly. RSV treatment is mostly supportive  
75 care because vaccines or therapies are unavailable (Oshansky et al., 2009; Hurwitz,  
76 2011; Simoes et al., 2015; Heylen et al., 2017). Although RSV's immediate effects can  
77 be catastrophic, up to 50% of hospitalized children develop long-term complications  
78 persisting into adulthood (Hall et al., 2013). RSV etiology and exacerbation have been  
79 attributed to host genetic factors (Miyairi and DeVincenzo, 2008; Grad et al., 2014), innate  
80 and adaptive immune responses (Kurt-Jones et al., 2000; Haynes et al., 2001; Murawski  
81 et al., 2009; You et al., 2013; Cormier et al., 2014; Huang et al., 2015; Schmidt and Varga,  
82 2017), pathophysiological factors (Becnel et al., 2005), and an immature immune system  
83 with delayed adaptive immune responses (Derscheid and Ackermann, 2013). The  
84 pulmonary innate immune response is the first-line defense. The molecular mechanisms  
85 of epithelial and immune responses in RSV-infected children are needed to implement  
86 prevention, identify biomarkers, and find therapeutics. However, advancements in RSV  
87 infection biology are limited due to difficulties in translating *in vitro* and *in vivo* models to  
88 humans as well as relating human studies in adults to infants (Mestas and Hughes, 2004;  
89 Papin et al., 2013).

90

91 Every cell produces reactive oxygen species (ROS) in mitochondria. ROS participate in  
92 cell signaling and increase with elevated metabolism. RSV and influenza increase ROS  
93 production in epithelial cells and some immune cells upon infection. Indeed, oxidative  
94 stress markers were elevated in nasopharyngeal secretions and blood from RSV-infected  
95 children (Hosakote et al., 2011). Specific inhibitors of complexes in mitochondrial  
96 respiration blocked RANTES (chemotactic factor) in RSV-infected A549 cells, indicating  
97 rapid mitochondrial ROS generation (<2 hr post infection) (Garofalo et al., 2013). RSV is  
98 also implicated in dysregulation of cellular metabolic homeostasis (Oshansky et al., 2009;  
99 Cervantes-Ortiz et al., 2016). Additionally, RSV significantly reduced bioenergetics in  
100 A549 and MH-S cell lines (Grunwell et al., 2018; Hu et al., 2019). Although these studies  
101 were in cell lines, they demonstrate involvement of mitochondrial metabolism in RSV  
102 infection. Nevertheless, cell lines inaccurately reflect respiratory-induced changes in host  
103 metabolism. Primary human respiratory cells are required to target host metabolism  
104 during respiratory antiviral drug identification (Smallwood et al., 2017).

105 Here, we quantified glycolysis and mitochondrial respiration of epithelial and immune cells  
106 isolated from nasopharyngeal aspirates (NPAs) from naturally infected, non-ventilated  
107 pediatric patients. We validated metabolic changes with metabolomics of upper  
108 respiratory fluids and identified six metabolites significantly altered by RSV. Since our  
109 retrospective study of positron emission tomography (PET) scans indicated RSV-induced  
110 hypermetabolism in pediatric patients, we determined if RSV induced hypermetabolism  
111 in the respiratory tract and altered metabolic pathways. This information will advance our  
112 understanding of RSV-host interactions for developing metabolite-targeting drugs  
113 (Smallwood et al., 2017). Nasal lavage fluids can be collected noninvasively from infants  
114 and children and provide temporary relief by clearing the sinuses. Thus, we determined  
115 if metabolites are sufficiently abundant in nasal lavage fluids for detection via mass  
116 spectrometry (MS) and identification of RSV biomarkers.

117  
118  
119  
120  
121  
122  
123  
124  
125  
126  
127  
128  
129  
130  
131  
132  
133  
134  
135  
136  
137  
138  
139  
140  
141  
142  
143  
144  
145  
146  
147  
148  
149  
150  
151  
152  
153  
154  
155  
156  
157  
158  
159  
160  
161

## **2 Materials and Methods**

### **Subjects and study procedures**

Inclusion criteria required participants who met the clinical case definition of RSV infection or were asymptomatic. This study was conducted in compliance with 45 CFR46 and the Declaration of Helsinki. Institutional Review Boards of the University of Tennessee Health Science Center/Le Bonheur Children's Hospital approved the study. Participants provided nasal swabs and nasal lavages after enrollment. Parents ranked participants' symptom severity and duration. St. Jude Children's Research Hospital approved the retrospective study of respiratory infected patients who received PET scans.

### **Infected patient PET scans**

These previously published data and methods were reanalyzed with respect to RSV. Briefly, patients with normal glucose levels received I.V. injections of fluorodeoxyglucose (FDG) after fasting. Relaxed, prone patients remained in a quiet, dark room. One hour later, transmission computed tomography (CT) and PET images were captured with a GE Discovery LS PET/CT system or 690 PET/CT system (GE Medical Systems, Waukesha, WI). Vendor-supplied software was used for reconstruction, and standardized uptake values were determined.

### **Pediatric nasal pharyngeal aspirates**

After enrollment subjects were swabbed and nasal rinses obtained. Nasal aspirates were obtained at enrollment, placed on ice immediately and small aliquot removed for diagnostics. Clinical diagnostics were performed including antigen test and quantitative reverse transcription PCR (RT-qPCR). The aspirates were immediately transported on ice to the research laboratory and cell separated by gently centrifuging. The supernatant was stored at -80°C, and the viability and number of upper respiratory cells (URCs) were determined.

### **Upper respiratory cell bioenergetics**

URCs (200,000 per well) were immediately seeded in XFe96 plates following the manufacturer's cell suspension protocol. The glycolytic stress test and mitochondrial stress test were performed in separate wells in the same plate to expedite measurements. Four to eight wells of technical replicates were run per patient sample. DNA per well was quantified with CyQUANT (Thermo Scientific, Waltham, MA) and used for data normalization. Data analysis was performed using Agilent Seahorse Wave software v2.6.1 (Agilent, Santa Clara, CA).

### **Single Cell RNA sequencing (scRNA-Seq)**



162 URCs were thawed and washed in HBSS with BSA, counted and enzymatically treated  
163 to reduce the mucosity. 5-10,000 cells per subject were filtered to remove dead cells,  
164 fixed with DSP, then 800 cells captured and single cell mRNA prepared for sequencing  
165 using Fluidigm C1 coupled to Ti2 Inverted imaging system with NIS Elements software  
166 (Nikon). scRNA-seq libraries of full length polyA-positive mRNA's were generated for  
167 each cell using SMART-Seq v4 technology (Takara). For barcoding, each C1-HT plate  
168 was divided into 20 columns of 40 cells each and each well labeled with a position specific  
169 barcode and each column was given a separate Nextera XT i7 index (Illumina). The  
170 resulting 800 cDNA's were pooled and NEBNext multiplex oligos for Illumina (the i5  
171 indexes; New England BioLabs) was used as a dual index primer. Ten C1 plates were  
172 combined for analysis using the NovaSeq 6000 System (Illumina). We used SingleR to  
173 cluster by cell types per subject and we analyzed enrichment of KEGG pathways per cell  
174 type.

175

### 176 **Metabolomics of upper respiratory fluids**

177

178 We performed metabolite extraction and UPLC–HR mass spectral analysis. Briefly,  
179 metabolites were solvent extracted, solvent evaporated, resuspended in water, and  
180 placed in a chilled autosampler for mass spectrometric analysis. Aliquots (10  $\mu$ L) were  
181 injected through a Synergi 2.5 micron reverse-phase Hydro-RP 100, 100 x 2.00 mm LC  
182 column (Phenomenex, Torrance, CA) and introduced into the MS via an electrospray  
183 ionization source conjoined to an Exactive™ Plus Orbitrap Mass Spectrometer (Thermo  
184 Scientific). We used full-scan mode with negative ionization mode (85–1000 m/z), 3 kV  
185 spray voltage, 10 psi flow rate at 320°C, 3e6 acquisition gain control, 140,000 resolution  
186 with scan windows of 0 to 9 minutes at 85 to 800 m/z and 9 to 25 minutes at 110 to 1000  
187 m/z and solvent gradient (Lu et al., 2010). Data files generated by Xcalibur (Thermo  
188 Scientific) were converted to open-source mzML format using ProteoWizard (Martens et  
189 al., 2011, Chambers et al. 2012). Maven (mzRoll) software (Apache Software Foundation,  
190 Wakefield, MA) automatically corrected total ion chromatograms based on the retention  
191 times for each sample and selected unknown peaks (Clasquin et al. 2012; Melamud et  
192 al. 2010). Metabolites were manually identified and integrated using known masses ( $\pm$  5  
193 ppm mass tolerance) and retention times ( $\Delta \leq 1.5$  min).

194

195 Multivariate statistical analysis for MS/MS data was performed using XLSTAT OMICS  
196 (Addinsoft, New York, NY) with Excel (Microsoft Corporation, Redmond, WA). To ensure  
197 observations were directly comparable and to account for respiratory secretion  
198 concentrations, peak intensity was normalized to total intensities. These data were  
199 independently k-means clustered followed by ascendant hierarchical clustering based on  
200 Euclidian distances. Data values of the permuted matrix were replaced by corresponding  
201 color intensities based on interquartile range with a color scale of red to green through  
202 black. Unsupervised multivariate principal component analysis (PCA) was performed,  
203 and the difference in metabolite concentrations per group was determined using one-way  
204 ANOVA with Benjamini-Hochberg post hoc correction. Significant differences were  
205 detected using Tukey's honest significant difference (HSD) test for multiple comparisons.  
206 Mean intensity data and standard deviation for each metabolite were graphed in Prism  
207 (GraphPad, San Diego, CA) and tested for significance using unpaired t-test.

208

### 209 3 Results

210

#### 211 **Hypermetabolism in the lungs of pediatric patients diagnosed with respiratory** 212 **infections**

213

214 We performed a retrospective study of pediatric patients diagnosed with respiratory viral  
215 infections confirmed by RT-qPCR who underwent FDG-PET/CT (Smallwood et al., 2017).  
216 FDG uptake is proportional to the metabolic rate of a region, and hypermetabolic lesions,  
217 regions, and foci are readily detected with FDG-PET/CT (Kostakoglu et al., 2003; Jadvar  
218 et al., 2005; Sharp et al., 2008; 2011; Davis et al., 2018). Several patients showed  
219 hypermetabolism in tumor-free lungs (Smallwood et al., 2017). We also found a significant  
220 temporal relationship: the sooner patients were scanned after infection diagnosis, the  
221 more likely they were to have hypermetabolic regions in their lungs (Smallwood et al.,  
222 2017). Representative images of uninfected, RSV infected, and a subject we followed for  
223 6 month as the RSV induced hypermetabolic regions subsided [Fig 1 A, B, and C  
224 respectively]. In these studies, we grouped all respiratory viruses together including RSV,  
225 metapneumovirus, RSV and metapneumovirus co-infection, adenovirus, parainfluenza,  
226 or influenza. Recently, we compared the temporal distribution of subjects separated by  
227 virus. Patients with glucose uptake were unevenly distributed among respiratory  
228 pathogens. Compared with influenza-infected patients (black + bars), RSV-infected  
229 patients were positive for glucose uptake in the lungs (red + bars) much longer **[Fig 1D]**.  
230 Additionally, 3 out of 4 patients scanned one week after RSV diagnosis exhibited FDG  
231 uptake in their lungs.

232

233 We performed time-to-event analysis on these groups to determine the proportion of  
234 patients who likely had hypermetabolic regions due to respiratory viral infections. We  
235 plotted the number of subjects at risk over time from RT-qPCR to PET scan using the  
236 product limit estimator method (Kaplan and Meier) to estimate the proportion of infected  
237 individuals who likely had glucose uptake in their lungs within 2 weeks of diagnosis.  
238 Adenovirus-infected patients had a median of 1.5 days, and influenza-infected patients  
239 had 3 days. By contrast, RSV had a median event time of 9 days. These curves were  
240 significantly different by log-rank using the Mantel-Cox test **[Fig 1E]**. We used the  
241 Pearson correlation test to determine the relationship between glucose uptake risk  
242 (percent) and time elapsed between diagnosis by RT-qPCR and PET scan. RSV had a  
243 significant positive relationship (r value: 0.9117,  $R^2$ : 0.8312, p value: 0.0006), indicating  
244 hypermetabolism in RSV-infected patients' lungs continued throughout the study interval,  
245 with higher associated risk one week after diagnosis.

246

247 To determine if these metabolic changes occurred in normal children with community-  
248 acquired RSV infections, we obtained NPAs from 11 hospitalized pediatric patients.  
249 Pediatric patients, neither intubated nor admitted to the ICU, were enrolled and swabbed  
250 for RSV antigen testing followed by NPA collection (Oshansky et al., 2014). We  
251 determined cell viability and numbers with acridine orange and propidium iodide. Five  
252 patients were excluded due to low cell viability and numbers. Six patients, all under two  
253 years old, were included (Table 1). Following the initial screening for RSV antigen, RSV

254 A and RSV B levels were quantified by RT-qPCR (Table 1). One RSV antigen-negative  
255 patient was RT-qPCR positive and moved to the infected group. A small level near  
256 baseline was detected in one control. However, based on the lack of RSV symptoms and  
257 testing negative for RSV antigen, this subject remained in the control group.

258  
259

## 260 **RSV increases glycolysis in upper airway cells**

261

262 URCs were immediately plated for bioenergetic analysis on an Xfe96 bioanalyzer.  
263 Bioenergetic states are based on substrate consumption for ATP production, and product  
264 efflux varies with cellular metabolism. Glycolysis tightly correlates with extracellular lactic  
265 acid accumulation (i.e.  $R^2 = 0.9101$ ), and lactic acid excretion per unit time in glycolysis  
266 accounts for most pH changes in most cell types (Legmann et al., 2011; TeSlaa and  
267 Teitell, 2014). Thus, Xfe96 measures the extracellular acidification rate (ECAR) as a  
268 proxy for glycolysis. However, infected immune cells use radical generation and pH in  
269 signaling and innate effector functions. Therefore, we used the glycolytic stress test to  
270 distinguish ECAR from glycolytic lactate from other cellular acidification sources (TeSlaa  
271 and Teitell, 2014; Zhou et al., 2015; Thomas, 2017). ECAR was quantified after glucose  
272 was added to URCs, followed by inhibiting ATP synthase with oligomycin to maximize  
273 glycolysis and hexokinase with 2-deoxyglucose (2-DG) [Fig. 2A]. 2-DG completely blocks  
274 glycolysis, allowing quantification of ECAR independent of glycolysis. After establishing  
275 baseline, we added glucose and determined basal ECAR. To isolate glycolytic ECAR, we  
276 subtracted residual non-glycolytic ECAR from basal ECAR. RSV infection significantly  
277 increased glycolysis in pediatric URCs [Fig 2A]. We then determined the maximal  
278 glycolytic output of URCs by inhibiting oxidative phosphorylation (OXPHOS) of ADP to  
279 ATP and the electron transport chain with oligomycin to force URCs to use glycolysis for  
280 ATP production. URCs from RSV-infected patients doubled their glycolytic capacity [Fig  
281 2A]. The glycolytic reserve is the difference between maximal glycolytic output and basal  
282 glycolysis and reflects the potential of cells to further increase reliance on glycolysis to  
283 meet energy demands. Glycolytic reserve significantly increased with RSV infection [Fig  
284 2A]. The final injection of 2-DG allowed quantification of non-glycolytic acidification, which  
285 significantly increased in RSV-infected patients, nearly two-fold greater than that in  
286 uninfected controls [Fig 2A].

287

## 288 **RSV increases mitochondrial respiration in upper airway cells**

289

290 To determine the flux of pyruvate into the TCA cycle to fuel OXPHOS, we used  
291 respirometry with Xfe96. We quantified the oxygen consumption rate (OCR) of URCs and  
292 isolated mitochondrial respiration with the mitochondrial stress test [Fig 2B]. The  
293 underlying principle of this test is the amount of oxygen consumed during respiration is  
294 stoichiometrically related to the amount of ADP and substrate of respiratory oxidation.  
295 Sequential inhibition of complex V (ATP synthase) and complexes I and III of the electron  
296 transport chain with oligomycin and a combination of rotenone and antimycin A,  
297 respectively, allow determination of respiration efficiency. OCR from non-mitochondrial  
298 sources such as NADPH oxidases can be quantified following complete inhibition of the  
299 mitochondrial electron transport chain by the final inhibitor, rotenone/antimycin A. We can

300 then determine and deduct the non-mitochondrial OCR, which can be high in activated  
301 immune cells.

302  
303 ATP fluctuations control basal mitochondrial respiration, which relies on and oscillates  
304 with substrate availability. Minor changes in maximal respiratory capacity or proton leak  
305 have little impact on basal respiration. Nonetheless, cell size or number can affect basal  
306 respiration. Thus, we used equal numbers of URCs and calculated the respiration rate  
307 per amount of DNA. RSV infection dramatically increased basal respiration approximate  
308 5.5 times that of uninfected controls **[Fig 2B]**. After defining basal respiration, we isolated  
309 the rate of mitochondrial ATP synthesis by adding oligomycin and quantifying the  
310 corresponding decrease in respiration. ATP production remained unchanged with  
311 increased proton leak following RSV infection **[Fig 2B]**. However, oligomycin slightly  
312 hyperpolarizes mitochondria, so this assay may underestimate ATP synthesis by less  
313 than 10% (Brand and Nicholls, 2011). Although RSV-infected URCs had significantly  
314 higher glycolysis, they maintained the ability to increase glycolysis in response to  
315 oligomycin, requisite for quantifying ATP production with this assay. After oligomycin,  
316 non-mitochondrial OCRs can be subtracted, and correction for hyperpolarization by  
317 oligomycin can help determine proton leak. RSV infection increased proton leak in URCs  
318 **[Fig 2B]**. Proton leak values for uninfected URCs are a function of inherently high non-  
319 mitochondrial oxygen consumption in this mixed cell population, including a large  
320 population of monocytes (Huang et al., 2015).

321  
322 In OXPHOS, substrate oxidation is coupled to ADP phosphorylation to ATP while  
323 mitochondria establish proton-motive force by pumping out protons that are returned by  
324 ATP synthase, thereby generating ATP. Mitochondrial coupling efficiency varies with ATP  
325 demand, is sensitive to mitochondrial dysfunction, and is similar to the phosphate/oxygen  
326 ratio (Brand and Nicholls, 2011). Mitochondrial coupling efficiency is ATP production  
327 divided by proton leak. RSV-infected URCs had significantly reduced mitochondrial  
328 coupling efficiency **[Fig2B]**. Next, we uncoupled oxygen consumption from ATP  
329 production by adding the protonophore FCCP to determine the maximal respiratory  
330 capacity of URCs. We found no difference between infected and uninfected maximal  
331 respiration **[Fig 2B]**. Notably, this method indirectly measures maximal mitochondrial  
332 respiration, representing maximal mitochondrial respiration within cellular substrate  
333 uptake and metabolism that influence respiratory chain activity.

334  
335 Calculating spare respiratory capacity by subtracting basal respiration from the maximal  
336 respiration rate can determine how closely cells operate near their OXPHOS threshold.  
337 Spare respiratory capacity is a cellular bioenergetic diagnostic because it reflects the  
338 cell's ability to coordinate substrate supply and oxidation with electron transport in  
339 response to increased energy demand (Nicholls et al., 2007; Yadava and Nicholls, 2007;  
340 Choi et al., 2009). RSV-infected URCs had significantly decreased spare respiratory  
341 capacity, amounting to a nearly 8-fold reduction **[Fig 2B]**.

342  
343 These bioenergetics analysis were on bulk URCs. To determine the contribution of cell  
344 subsets, we performed single cell transcriptomics on these revived URCs. We used  
345 SingleR to cluster by cell types per subject and we analyzed enrichment of KEGG



346 pathways per cell type. We found CD8+ T cells, monocytes and neutrophils were enriched  
347 in several pathways associated with viral replication and infection (e.g. RNA transport and  
348 HIV/HCV/EBV infection) are upregulated following RSV infection **[Fig 3A-C]**. We found  
349 epithelial cells in fresh URCs, with viral inclusion bodies, using microscopy (DNS). Yet we  
350 did not find epithelial cells with scRNA-seq and suspected these cells were depleted by  
351 our removal of dead cells prior to cell capture. Indeed, when we performed flow cytometry  
352 on banked URCs samples from RSV infected children, we found immune cells but very  
353 few live epithelial cells (DNS). A similar study used the quantitative proteomic analysis  
354 identified significant enrichment of immune cell pathways in revived RSV-infected URCs  
355 (Aljabr et al., 2019). Thus, we anticipated the enrichment of these pathways but were  
356 surprised to find relatively low metabolic pathway changes in revived URC immune cells.  
357 It is possible epithelial cells are the main contributors to the significant increase in  
358 metabolism in RSV infected URCs, but we cannot rule out the effects of cryopreservation  
359 on dampening immunometabolism. Thus, it appears similar to bioenergetics, single cell  
360 transcriptomics may require fresh URCs to capture the metabolic response of URCs.

361

### 362 **RSV infection alters metabolites in upper airway fluids**

363

364 Next, we wanted to determine if airway fluids reflect the molecular mechanisms driving  
365 metabolic changes in RSV-infected URCs. To identify any differences in metabolites in  
366 upper airway fluids from RSV-infected patients, we performed targeted discovery  
367 metabolomics (TDM) using MS. After cells were removed for bioenergetic measures, we  
368 organically extracted metabolites from the NPA supernatant. Metabolites were injected  
369 through a reverse-phase LC column and analyzed on an Exactive™ Plus Orbitrap Mass  
370 Spectrometer (Thermo Scientific). The spectra were taken in full-scan mode with negative  
371 ionization (Lu et al., 2010). RAW files were converted to open-source mzML format, and  
372 total ion chromatograms for each sample were corrected based on retention times  
373 (Melamud et al., 2010; Martens et al., 2011; Chambers et al., 2012). We previously  
374 determined the masses ( $\pm 5$  ppm mass tolerance) and retention times ( $\Delta \leq 1.5$  min) of  
375 300 metabolites associated with disease pathologies. We manually identified and  
376 integrated NPA metabolites using our previously determined masses and retention times  
377 for targeted discovery. With TDM-MS, we identified 35 metabolites in the NPA [Sup File  
378 1].

379

380 To determine the dataset structure and relationships between groups, we used  
381 unsupervised multivariate statistical analysis. Metabolites and individuals were clustered  
382 independently using k-means clustering followed by ascendant hierarchical clustering  
383 based on Euclidian distances. We arranged data matrices according to the clustering with  
384 spatial relationships proportional to similarity among patients or metabolites **[Fig 3D]**. The  
385 top horizontal dendrogram separates patients while the vertical groups metabolites, each  
386 by how strongly their concentrations correlate. With metabolite peak intensities  
387 rearranged according to metabolite clustering, the metabolites are divided into two distinct  
388 groups on the y-axis **[Fig 3D-left dendrogram]**. These groups show metabolite  
389 concentrations depending on RSV infection. The patient samples are also divided into  
390 two groups **[Fig 3D-top dendrogram]**. Interestingly, RSV-infected patient 3 (RSV3)  
391 grouped with the healthy control (Ctl), whereas RSV patients 1, 2, and 4 clustered

392 together [Fig 3D]. When we decoded the samples, patient 3 had been symptomatic for  
393 21 days, while the other RSV-infected patients were symptomatic for a week or less  
394 [Table 1]. This finding might reflect the kinetics of returning to metabolic homeostasis in  
395 the upper airway. However, more data are needed to confirm this idea. The control and  
396 RSV3 group display an inverse pattern of metabolites with a relatively low concentration  
397 in the top metabolite cluster and relatively high concentrations in the bottom cluster [Fig  
398 3D]. In contrast, RSV patients 1, 2, and 4 exhibit lower concentrations for most  
399 metabolites.

400  
401 To evaluate group trends and sample uniformity as well as identify potential outliers, we  
402 used PCA. Variation was explained by F1 and F2 very well with a cumulative percent  
403 variability of 95.57% [Fig 3E]. Furthermore, the F1 or F2 squared cosines of each patient  
404 observation exceeded 0.5 (DNS). Again, RSV patient 3 had a closer relationship to  
405 controls than to patients with more recent symptom onset [Fig 3E (red triangle 3)]. The  
406 overlap of RSV patient 3 and controls likely reflects the trajectory of this patient's recovery  
407 [Table 1]. Accordingly, patient 3 was removed from comparative analysis for RSV-  
408 associated metabolites.

409  
410 To identify specific metabolic products that change during RSV infection, we compared  
411 uninfected controls to RSV-infected patients who were symptomatic for less than a week  
412 (acute RSV). We used one-way ANOVA with Tukey's HSD test and Benjamini-Hochberg  
413 post hoc correction to identify metabolites with significant differences among the groups.  
414 Six upper respiratory fluid metabolites were significantly different in patients with acute  
415 RSV [Fig 3F]. Significant depleted compounds in RSV infected samples included lactate,  
416 taurine, and guanosine. On the other hand, RSV infection triggered increased levels of  
417 some metabolites including citrate, D-gluconate and malate compared to non-infected  
418 samples.

## 419 420 Discussion

421  
422 Our retrospective study of pediatric patients who received PET scans within 15 days of  
423 clinical diagnosis with respiratory viral infection showed RSV-infected patients are  
424 positive for glucose uptake in the lungs much longer than influenza-infected patients [Fig  
425 1A]. To determine if these metabolic changes were reflected in children with community-  
426 acquired RSV infections, we performed bioenergetic analysis on URCs obtained from  
427 pediatric patients diagnosed with RSV. We found RSV infection significantly increases  
428 glycolysis in pediatric URCs. Furthermore, glycolytic reserve significantly increased with  
429 RSV infection [Fig 2A]. By contrast, *in vitro* influenza infection had no effect on normal  
430 human bronchial epithelial cells nor glycolytic reserve in murine dendritic cells  
431 (Smallwood et al., 2017; Rezinciuc et al., 2020). Altogether, these observations indicate  
432 URCs in RSV-infected pediatric patients RSV are highly glycolytic. Accumulating  
433 evidence suggests viruses induce glycolysis to facilitate viral replication (Sanchez and  
434 Lagunoff, 2015; Yu et al., 2018; Passalacqua et al., 2019).

435 OCR quantification in fresh URCs indicates RSV significantly increased basal respiration  
436 and proton leak without affecting ATP production. Significantly reduced mitochondrial  
437 coupling efficiency was also observed [Fig 2B]. When comparing cells, coupling

438 efficiency is a reliable indicator of mitochondrial dysfunction as an internally normalized  
439 ratio sensitive to changes in all bioenergetic flux components (Brand and Nicholls, 2011).  
440 With increased basal respiration and unaffected ATP production, proton re-entry is the  
441 major respiratory influence, and severely blunted maximal mitochondrial respiration  
442 suggests RSV-induced changes in respiration occur at substrate oxidation upstream of  
443 the proton circuit (Hafner and Brand, 1991; Porter and Brand, 1995) (Brand and Nicholls,  
444 2011) Nonetheless, declining maximum respiratory capacity is considered a strong  
445 indicator of potential mitochondrial dysfunction. URCs from RSV-infected children show  
446 a significant drop in spare respiratory capacity, demonstrating how closely cells are  
447 operating at their bioenergetic threshold. In RSV infection, induced basal respiration is  
448 nearly maximized. Loss of spare respiratory capacity also indicates mitochondrial  
449 dysfunction, and this loss of function “may not be particularly apparent under basal  
450 conditions, when respiration rate is strongly controlled by ATP turnover, but becomes  
451 manifested only under load when ATP demand increases and substrate oxidation more  
452 strongly limits respiration” (Brand and Nicholls, 2011) Indeed, this issue became apparent  
453 when comparing the basal and maximal respiration of uninfected patients’ URCs,  
454 revealing a significant difference [**Fig 2B, RSV(-) Respiration**]. In contrast, basal and  
455 maximal respiration rates were nearly identical in RSV-infected patients’ URCs [**Fig 2B,**  
456 **RSV (+) Respiration**]. These data indicate RSV infection increases respiration in URCs  
457 to near maximal levels, resulting in loss of spare respiratory capacity with impaired  
458 coupling efficiency and increased proton leak, ultimately detrimental to efficient ATP  
459 production.

460 MS analysis of metabolic products changing during RSV infection shows increased  
461 lactate in upper airway fluid. Consistently, glycolysis significantly increased in RSV-  
462 infected patient cells. However, lactate turnover flux exceeds that of glucose and is the  
463 highest of all circulating metabolites (Annison et al., 1963; Okajima et al., 1981; Hui et al.,  
464 2017) Consistent with RSV dramatically increasing mitochondrial metabolism, <sup>13</sup>C-lactate  
465 extensively labels TCA cycle intermediates equal to glucose in all tissues except the brain  
466 and is the primary contributor to tissue TCA metabolism in fasting. In addition to increased  
467 URC mitochondrial metabolism with significantly reduced airway fluid lactate levels, TCA  
468 cycle intermediates citrate and malate were significantly increased in the upper  
469 respiratory fluids of RSV-infected patients [Fig 3C]. In the lung, citrate and malate  
470 concentrations are higher than other TCA intermediates like succinate and are TCA  
471 products derived from glucose and lactate metabolism in the lung (Hui et al., 2017).

472 In most cells, glucose is metabolized via glycolytic pyruvate in the TCA cycle, which  
473 efficiently produces ATP (Vander Heiden et al., 2009) . In contrast, most cancers and  
474 transformed cell lines use aerobic glycolysis, referred to as the Warburg effect, where the  
475 demand for anabolic metabolites drives less efficient ATP production by uncoupling  
476 glycolysis and the TCA cycle to allow carbon commitment to macromolecule production  
477 as opposed to ATP output regardless of the availability of oxygen. This phenotype reflects  
478 an increase in metabolic demands for cell proliferation (Vander Heiden et al., 2009). Our  
479 metabolic and bioenergetic studies show that RSV re-wires metabolism in a manner that  
480 resembles Warburg metabolism. However, we found a very significant increase in basal  
481 respiration in the URC and a significant decrease in lactate in the upper respiratory fluids.  
482 Typically, one would expect a decrease in OCR and increase in lactate accumulation for  
483 traditional Warburg metabolism, but more studies are required to precisely define carbon

484 metabolism in RSV infection. Further, if RSV infection aims to rapidly change metabolism  
485 in a proviral phenotype, kinetics may be more important than ATP efficiency. Indeed, in  
486 some studies glycolysis supports flexible carbon metabolism with rapid production of ATP  
487 (i.e. faster than the complete oxidation of glucose in the mitochondria). However, we  
488 measured the ATP production supported through respiration not glycolysis. We did not  
489 recover enough URCs to perform an ATP rate assay in parallel, but our future studies will  
490 dissect the contribution of both pathways. As noted above, the mitochondrial stress these  
491 underestimates ATP production. How this reconciles with high glycolysis and  
492 mitochondrial respiration as measured here remains to be seen, but it is apparent RSV  
493 infected cell bioenergetics are very high irrespective of efficiency of ATP production. We  
494 found it surprising that both glycolysis and mitochondrial respiration were significantly  
495 increased, even if respiration efficiency is compromised by RSV infection, ATP is still  
496 being produced at least as well as uninfected. Glycolysis, in the Warburg metabolic  
497 phenotype discussed above, actually produces enough ATP for genome and cell  
498 proliferation in cancer. Here one wonders if the RSV infected cells unusually high  
499 metabolism contributes to rapid cell death.

500 Our data indicate community-acquired RSV infection dramatically increases glycolysis  
501 and mitochondrial metabolism in the airways of pediatric patients. We found strong  
502 evidence of hyperglycolytic metabolism in patient lungs and significant increased  
503 glycolysis and mitochondrial respiration in respiratory cells and fluids from the upper  
504 respiratory tract of infected patients. However, our patient studies contradict current  
505 findings delineating decreased bioenergetics using RSV infection of A549 cells and MH-  
506 S cell lines (Grunwell et al., 2018; Hu et al., 2019) and a more recent study by Martín-  
507 Vicente et al 2020 that indicated Warburg (i.e. increase glycolysis with decreased TCA)  
508 in A549 following RSV. Why these *in vitro* models contradict our patient findings remains  
509 unknown, but based on our previous studies with influenza it is likely due to the inherent  
510 metabolic nature of transformed cell lines (Smallwood et al., 2017). Clearly, URCs show  
511 significantly increased glycolysis and mitochondrial respiration reflected by the  
512 metabolites flushed out with upper airway fluids. These findings may be instrumental in  
513 developing an accurate cell model to study RSV-induced changes in host metabolism of  
514 the respiratory tract.

515  
516 The bioenergetics of patient URCs remain undefined in RSV or other respiratory  
517 infections. The absence of progress is most likely due to the bioenergetic instability of  
518 repository cells following rescue from cryopreservation. Indeed, metabolic recovery of  
519 URCs from freeze thaw overwhelms effects induced by infection (DNS). To avoid the  
520 effect of freeze thawing, we collected NPAs from six patients and immediately measured  
521 their bioenergetics. In the future, we will perform single cell transcriptomics on fresh URCs  
522 to capture epithelial cells. These studies are limited by patient number because  
523 measuring bioenergetics in delicate URCs from our repository is challenging.  
524 Nonetheless, with fresh URCs, we confirmed previous results: RSV increased  
525 bioenergetics in the lungs of adult and neonatal C57BL/6 mice based on oxygen  
526 consumption and ATP concentrations (Alsuwaidi et al., 2014). After unsuccessfully  
527 sorting and measuring URC bioenergetics, these analyses were performed on bulk  
528 URCs. Without single cell metabolomics, we cannot define the relative contribution of cell  
529 subsets within URCs to changes in bioenergetics. We are currently addressing this issue



530 and are aware these findings represent initial clinical observations. Although incomplete,  
531 the evidence obtained from our samples suggests community-acquired RSV has a  
532 profound effect on respiratory metabolism, representing a potential drug target.

533  
534

### 535 **Acknowledgments**

536

537 We thank the staff of Le Bonheur Children's and St Jude Children's Research Hospitals  
538 for their work caring for their patients and supporting our studies. We thank Lisa Harrison  
539 and Elizabeth Meals for enrolling and consenting subjects and sample collection and the  
540 Le Bonheur Children's Hospital molecular diagnostics lab. Mass spectrometric analysis  
541 was performed at the Biological and Small Molecule Mass Spectrometry Core, University  
542 of Tennessee, Knoxville, TN, with the assistance of Dr. Shawn R. Campagna, Dr. Hector  
543 F. Castro, Sara Howard and Eric Tague.

544

### 545 **Author Contributions**

546

547 S.R. and L.B NPA metabolite and cell sample preparation, drug/cell titrations, XFe96  
548 assays; A.B. data analysis and writing; S.R., J.F.I. sc-RNA-Seq; Y.Y.K. RT-qPCR; S.C.  
549 URC characterization; J.P.D. clinical coordination, enrollment, and sample collection;  
550 B.L.S. retrospective clinical study and PET scan analysis; H.S.S. data analysis,  
551 experiment coordination, and manuscript writing.

552

### 553 **Conflict of Interest**

554

555 The authors have declared no conflict of interest exists.

556

### 557 **Financial Support**

558

559 This research was supported by Le Bonheur Children's Hospital and the Children's  
560 Foundation Research Institute [https://www.lebonheur.org/research-and-  
561 education/research/](https://www.lebonheur.org/research-and-education/research/) and Children's Foundation Research Institute, Memphis,  
562 Tennessee, USA. (H.S.). and S.C. Sources of funding: Funded by the National Institutes  
563 of Health (NIAID), grant number AI090059, to SAC.

564 The funders had no role in study design, data collection and analysis, decision to  
565 publish, or preparation of the manuscript.

566

567

568

569

570

571

572

573

574

575

576

577

578

579

580 **Table 1. Pediatric participant anthropomorphic data, nasal swab results (antigen**  
581 **test), NPA cell viability, NPA cell number, and RT-qPCR results.**  
582

| <b>Age (days)</b> | <b>Symptom Duration (days)</b> | <b>Antigen Test</b> | <b>Viability (%)</b> | <b>Cell Number (per ml)</b> | <b>RSV A RT-qPCR (PFUe/ml)</b> | <b>RSV B RT-qPCR (PFUe/ml)</b> | <b>Subject Identifier</b> |
|-------------------|--------------------------------|---------------------|----------------------|-----------------------------|--------------------------------|--------------------------------|---------------------------|
| 142               | 3                              | -                   | 71                   | 1.45 x 10 <sup>7</sup>      | 0                              | 0.15                           | Ctl 1 <sup>‡</sup>        |
| 415*              | 4                              | -                   | 67                   | 1.59 x 10 <sup>6</sup>      | 0                              | 0                              | Ctl 2                     |
| 457*              | 7                              | -                   | 74                   | 5.61 x 10 <sup>6</sup>      | 0                              | 5.93                           | RSV 1 <sup>‡</sup>        |
| 57                | 3                              | +                   | 84                   | 2.13 x 10 <sup>7</sup>      | 0                              | 5                              | RSV 2 <sup>‡</sup>        |
| 149               | 21                             | +                   | 77                   | 1.57 x 10 <sup>7</sup>      | 6.39                           | 0                              | RSV 3                     |
| 117               | 7                              | +                   | 77                   | 3.44 x 10 <sup>6</sup>      | 0                              | 4.13                           | RSV 4 <sup>‡</sup>        |

\* Adjusted age corrected for premature birth; ‡ Negative for influenza

583

584 **Figure Legends**

585

586 **Figure 1. Hypermetabolism in the lungs of pediatric patients diagnosed with respiratory**  
587 **infections.** We performed a retrospective study of pediatric patients who received PET scans  
588 within 15 days of clinical diagnosis with respiratory viral infection. Acceptance criteria included  
589 confirmation of clinical diagnosis with RT-qPCR within 15 days of PET scan. Whole body  
590 transmission CT and PET images were obtained after patients with normal blood glucose fasted  
591 for 4 or more hours and were given 5.5 MBq/kg FDG intravenously followed by a 1-hr uptake  
592 period. (A) The number of patients scanned is plotted against time in days from RT-qPCR to PET  
593 scan, and zero indicates the scan and RT-qPCR were performed on the same day. Subjects are  
594 colored by viral group with positive or negative symbols indicating presence or absence of glucose  
595 uptake in the PET scan. (B) The Kaplan and Meier product limit method was used to create curves  
596 for the infected subjects at risk for hypermetabolism diagnosed by PET scan, and the curves were  
597 compared with log-rank tests (AV: Adenovirus; PI: Parainfluenza virus; IV: Influenza virus). The  
598 Mantel-Cox log-rank test and the Gehan-Breslow-Wilcoxon test indicated the curves were  
599 significantly different with p-values of 0.0018 and 0.0038, respectively. The Pearson correlation  
600 test was performed on each event risk curve. Both PI and RSV infected groups had significant  
601 temporal correlations (associated p-values of 0.0078 and 0.0250, respectively) represented by  
602 asterisks. With Pearson's r values of -0.9922 and -0.8165 and  $R^2 = 0.9845$  and 0.6667,  
603 respectively.

604

605 **Figure 2. RSV induced significant increases in glycolysis and mitochondrial respiration.**  
606 After NPA collection and enumeration, 200,000 viable URCs per well were plated in technical  
607 replicates distributed on one plate per patient. Each plate was subjected to the Glycolysis Stress  
608 Test and Cell Mito Stress Test in parallel on the same plate. The plates and cells were processed  
609 and read on XFe96 following the manufacturer's protocols. Bioenergetics data processing and  
610 analysis of XFe assays was done using XF96 software. Oxygen consumption rates (OCRs) and  
611 respiratory parameters and extracellular acidification (ECAR) and glycolytic parameters were  
612 derived from kinetic rate data calculated using stress test profiles per manufacturer's guidelines.  
613 These data were exported to Prism. Bar graphs represent the mean and standard deviation of each  
614 patient group with asterisks symbolizing p-values determined using two-tailed unpaired t tests (P  
615 values: 0.05 (\*), <0.01 (\*\*), <0.001 (\*\*\*) and  $\leq 0.0001$  (\*\*\*\*)).  
616

617 **Figure 3. RSV infection changes metabolite composition in upper respiratory fluids.**

618 URCs were thawed, washed, and filtered to remove dead cells. 5-10,000 cells per subject were  
619 fixed, 800 cells captured and single cell mRNA prepared for sequencing using Fluidigm C1  
620 platform. scRNA-Seq libraries of full length polyA-positive mRNA's were generated for each cell  
621 using SMART-Seq v4 technology (Takara). For barcoding, each C1-HT plate was divided into 20  
622 columns of 40 cells each and each well labeled with a position specific barcode and each column  
623 was given a separate Nextera XT i7 index (Illumina). The resulting 800 cDNA's were pooled and  
624 given a dual index primer (NEBNext multiplex oligos for Illumina). Ten C1 plates were combined  
625 for analysis using the NovaSeq 6000 System (Illumina). We used SingleR to cluster by cell types  
626 per subject and we analyzed enrichment of KEGG pathways per cell type (A-C). Metabolites were  
627 extracted from 50 $\mu$ l of NPA supernatant and subjected to UPLC-HRMS metabolomics.  
628 Metabolites were extracted from 50  $\mu$ l NPA supernatant and subjected to UPLC-HRMS  
629 metabolomics analysis three times per sample. Metabolites were manually identified and  
630 integrated using known masses ( $\pm 5$  ppm mass tolerance) and retention times ( $\Delta \leq 1.5$  min). Peak  
631 intensity was normalized to the sum of peak intensity. (A) Metabolites were K-means clustered  
632 followed by ascendant hierarchical clustering based on Euclidian distances and nondynamic  
633 metabolites excluded ( $0.25 < \text{std dev}$ ). Metabolite clusters were also represented via dendrograms  
634 displayed vertically for metabolites and horizontally for patients. The data values of the permuted  
635 matrix were replaced by corresponding color intensities based on interquartile range with color  
636 scale of red to green through black, resulting in a heat map. (C) Unsupervised multivariate  
637 principal component analysis (PCA) was performed, resulting in F1 and F2 with a cumulative  
638 percent variability of 97.02%. Replicated for each subject are joined by lines and subject number  
639 indicated in the triangle center. (E) One-way ANOVA with Tukey's honestly significant difference  
640 test and Benjamini-Hochberg post hoc correction was used to identify metabolites with significant  
641 differences among the patient groups (XLSTAT, Addinsoft). Relative intensity data for each  
642 metabolite were graphed in Prism. Bar graphs represent the mean and standard deviation of each  
643 patient group with asterisks symbolizing p-values determined using two-tailed unpaired t tests [P  
644 values: 0.05 (\*) and  $<0.01$  (\*\*)] (F).

645  
646  
647

648

649

## 650 9 References

- 651
- 652 Aljabr, W., Armstrong, S., Rickett, N.Y., Pollakis, G., Touzelet, O., Cloutman-Green, E., et al.  
653 (2019). High Resolution Analysis of Respiratory Syncytial Virus Infection In Vivo. *Viruses*  
654 11(10), 926.
- 655 Alsuwaidi, A.R., Albawardi, A., Almarzooqi, S., Benedict, S., Othman, A.R., Hartwig, S.M., et al.  
656 (2014). Respiratory syncytial virus increases lung cellular bioenergetics in neonatal  
657 C57BL/6 mice. *Virology* 454-455, 263-269. doi: 10.1016/j.virol.2014.02.028.
- 658 Annison, E.F., Lindsay, D.B., and White, R.R. (1963). Metabolic Interrelations of Glucose and  
659 Lactate in Sheep. *Biochem J* 88, 243-248. doi: 10.1042/bj0880243.
- 660 Becnel, D., You, D., Erskin, J., Dimina, D.M., and Cormier, S.A. (2005). A role for airway  
661 remodeling during respiratory syncytial virus infection. *Respir Res* 6, 122. doi:  
662 10.1186/1465-9921-6-122.
- 663 Brand, M.D., and Nicholls, D.G. (2011). Assessing mitochondrial dysfunction in cells. *Biochem J*  
664 435(2), 297-312. doi: 10.1042/BJ20110162.
- 665 Cervantes-Ortiz, S.L., Zamorano Cuervo, N., and Grandvaux, N. (2016). Respiratory Syncytial  
666 Virus and Cellular Stress Responses: Impact on Replication and Physiopathology.  
667 *Viruses* 8(5). doi: 10.3390/v8050124.
- 668 Chambers, M.C., Maclean, B., Burke, R., Amodei, D., Ruderman, D.L., Neumann, S., et al.  
669 (2012). A cross-platform toolkit for mass spectrometry and proteomics. *Nat Biotechnol*  
670 30(10), 918-920. doi: 10.1038/nbt.2377.
- 671 Choi, S.W., Gerencser, A.A., and Nicholls, D.G. (2009). Bioenergetic analysis of isolated  
672 cerebrocortical nerve terminals on a microgram scale: spare respiratory capacity and  
673 stochastic mitochondrial failure. *J Neurochem* 109(4), 1179-1191. doi: 10.1111/j.1471-  
674 4159.2009.06055.x.
- 675 Cormier, S.A., Shrestha, B., Saravia, J., Lee, G.I., Shen, L., DeVincenzo, J.P., et al. (2014).  
676 Limited type I interferons and plasmacytoid dendritic cells during neonatal respiratory  
677 syncytial virus infection permit immunopathogenesis upon reinfection. *J Virol* 88(16),  
678 9350-9360. doi: 10.1128/JVI.00818-14.
- 679 Davis, J.C., Daw, N.C., Navid, F., Billups, C.A., Wu, J., Bahrami, A., et al. (2018). (18)F-FDG  
680 Uptake During Early Adjuvant Chemotherapy Predicts Histologic Response in Pediatric  
681 and Young Adult Patients with Osteosarcoma. *J Nucl Med* 59(1), 25-30. doi:  
682 10.2967/jnumed.117.190595.
- 683 Deprez, M., Zaragosi, L.-E., Truchi, M., Garcia, S.R., Arguel, M.-J., Lebrigand, K., et al. (2019).  
684 A single-cell atlas of the human healthy airways. *bioRxiv*, 2019.2012.2021.884759. doi:  
685 10.1101/2019.12.21.884759.
- 686 Derscheid, R.J., and Ackermann, M.R. (2013). The innate immune system of the perinatal lung  
687 and responses to respiratory syncytial virus infection. *Vet Pathol* 50(5), 827-841. doi:  
688 10.1177/0300985813480216.
- 689 Garofalo, R.P., Kolli, D., and Casola, A. (2013). Respiratory syncytial virus infection:  
690 mechanisms of redox control and novel therapeutic opportunities. *Antioxid Redox Signal*  
691 18(2), 186-217. doi: 10.1089/ars.2011.4307.
- 692 Grad, Y.H., Newman, R., Zody, M., Yang, X., Murphy, R., Qu, J., et al. (2014). Within-host  
693 whole-genome deep sequencing and diversity analysis of human respiratory syncytial  
694 virus infection reveals dynamics of genomic diversity in the absence and presence of  
695 immune pressure. *J Virol* 88(13), 7286-7293. doi: 10.1128/JVI.00038-14.
- 696 Grunwell, J.R., Yeligar, S.M., Stephenson, S., Ping, X.D., Gauthier, T.W., Fitzpatrick, A.M., et al.  
697 (2018). TGF-beta1 Suppresses the Type I IFN Response and Induces Mitochondrial  
698 Dysfunction in Alveolar Macrophages. *J Immunol* 200(6), 2115-2128. doi:  
699 10.4049/jimmunol.1701325.



- 700 Hafner, R.P., and Brand, M.D. (1991). Effect of protonmotive force on the relative proton  
701 stoichiometries of the mitochondrial proton pumps. *Biochem J* 275 ( Pt 1), 75-80. doi:  
702 10.1042/bj2750075.
- 703 Hall, C.B., Weinberg, G.A., Blumkin, A.K., Edwards, K.M., Staat, M.A., Schultz, A.F., et al.  
704 (2013). Respiratory syncytial virus-associated hospitalizations among children less than  
705 24 months of age. *Pediatrics* 132(2), e341-348. doi: 10.1542/peds.2013-0303.
- 706 Haynes, L.M., Moore, D.D., Kurt-Jones, E.A., Finberg, R.W., Anderson, L.J., and Tripp, R.A.  
707 (2001). Involvement of toll-like receptor 4 in innate immunity to respiratory syncytial  
708 virus. *J Virol* 75(22), 10730-10737. doi: 10.1128/JVI.75.22.10730-10737.2001.
- 709 Heylen, E., Neyts, J., and Jochmans, D. (2017). Drug candidates and model systems in  
710 respiratory syncytial virus antiviral drug discovery. *Biochem Pharmacol* 127, 1-12. doi:  
711 10.1016/j.bcp.2016.09.014.
- 712 Hosakote, Y.M., Jantzi, P.D., Esham, D.L., Spratt, H., Kurosky, A., Casola, A., et al. (2011).  
713 Viral-mediated inhibition of antioxidant enzymes contributes to the pathogenesis of  
714 severe respiratory syncytial virus bronchiolitis. *Am J Respir Crit Care Med* 183(11),  
715 1550-1560. doi: 10.1164/rccm.201010-1755OC.
- 716 Hu, M., Schulze, K.E., Ghildyal, R., Henstridge, D.C., Kolanowski, J.L., New, E.J., et al. (2019).  
717 Respiratory syncytial virus co-opts host mitochondrial function to favour infectious virus  
718 production. *Elife* 8. doi: 10.7554/eLife.42448.
- 719 Huang, H., Saravia, J., You, D., Shaw, A.J., and Cormier, S.A. (2015). Impaired gamma delta T  
720 cell-derived IL-17A and inflammasome activation during early respiratory syncytial virus  
721 infection in infants. *Immunol Cell Biol* 93(2), 126-135. doi: 10.1038/icb.2014.79.
- 722 Hui, S., Ghergurovich, J.M., Morscher, R.J., Jang, C., Teng, X., Lu, W., et al. (2017). Glucose  
723 feeds the TCA cycle via circulating lactate. *Nature* 551(7678), 115-118. doi:  
724 10.1038/nature24057.
- 725 Hurwitz, J.L. (2011). Respiratory syncytial virus vaccine development. *Expert Rev Vaccines*  
726 10(10), 1415-1433. doi: 10.1586/erv.11.120.
- 727 Jadvar, H., Alavi, A., Mavi, A., and Shulkin, B.L. (2005). PET in pediatric diseases. *Radiol Clin*  
728 *North Am* 43(1), 135-152.
- 729 Kostakoglu, L., Agress, H., Jr., and Goldsmith, S.J. (2003). Clinical role of FDG PET in  
730 evaluation of cancer patients. *Radiographics* 23(2), 315-340; quiz 533. doi:  
731 10.1148/rg.232025705.
- 732 Kurt-Jones, E.A., Popova, L., Kwinn, L., Haynes, L.M., Jones, L.P., Tripp, R.A., et al. (2000).  
733 Pattern recognition receptors TLR4 and CD14 mediate response to respiratory syncytial  
734 virus. *Nat Immunol* 1(5), 398-401. doi: 10.1038/80833.
- 735 Legmann, R., Melito, J., Belzer, I., and Ferrick, D. (2011). Analysis of glycolytic flux as a rapid  
736 screen to identify low lactate producing CHO cell lines with desirable monoclonal  
737 antibody yield and glycan profile. *BMC Proc* 5 Suppl 8, P94. doi: 10.1186/1753-6561-5-  
738 S8-P94.
- 739 Lu, W., Clasquin, M.F., Melamud, E., Amador-Noguez, D., Caudy, A.A., and Rabinowitz, J.D.  
740 (2010). Metabolomic analysis via reversed-phase ion-pairing liquid chromatography  
741 coupled to a stand alone orbitrap mass spectrometer. *Anal Chem* 82(8), 3212-3221. doi:  
742 10.1021/ac902837x.
- 743 Martens, L., Chambers, M., Sturm, M., Kessner, D., Levander, F., Shofstahl, J., et al. (2011).  
744 mzML--a community standard for mass spectrometry data. *Mol Cell Proteomics* 10(1),  
745 R110 000133. doi: 10.1074/mcp.R110.000133.
- 746 Melamud, E., Vastag, L., and Rabinowitz, J.D. (2010). Metabolomic analysis and visualization  
747 engine for LC-MS data. *Anal Chem* 82(23), 9818-9826. doi: 10.1021/ac1021166.
- 748 Mestas, J., and Hughes, C.C. (2004). Of mice and not men: differences between mouse and  
749 human immunology. *J Immunol* 172(5), 2731-2738. doi: 10.4049/jimmunol.172.5.2731.

- 750 Miyairi, I., and DeVincenzo, J.P. (2008). Human genetic factors and respiratory syncytial virus  
751 disease severity. *Clin Microbiol Rev* 21(4), 686-703. doi: 10.1128/CMR.00017-08.
- 752 Murawski, M.R., Bowen, G.N., Cerny, A.M., Anderson, L.J., Haynes, L.M., Tripp, R.A., et al.  
753 (2009). Respiratory syncytial virus activates innate immunity through Toll-like receptor 2.  
754 *J Virol* 83(3), 1492-1500. doi: 10.1128/JVI.00671-08.
- 755 Nicholls, D.G., Johnson-Cadwell, L., Vesce, S., Jekabsons, M., and Yadava, N. (2007).  
756 Bioenergetics of mitochondria in cultured neurons and their role in glutamate  
757 excitotoxicity. *J Neurosci Res* 85(15), 3206-3212. doi: 10.1002/jnr.21290.
- 758 Okajima, F., Chenoweth, M., Rognstad, R., Dunn, A., and Katz, J. (1981). Metabolism of 3H-  
759 and 14C-labelled lactate in starved rats. *Biochem J* 194(2), 525-540. doi:  
760 10.1042/bj1940525.
- 761 Oshansky, C.M., Gartland, A.J., Wong, S.S., Jeevan, T., Wang, D., Roddam, P.L., et al. (2014).  
762 Mucosal immune responses predict clinical outcomes during influenza infection  
763 independently of age and viral load. *Am J Respir Crit Care Med* 189(4), 449-462. doi:  
764 10.1164/rccm.201309-1616OC.
- 765 Oshansky, C.M., Zhang, W., Moore, E., and Tripp, R.A. (2009). The host response and  
766 molecular pathogenesis associated with respiratory syncytial virus infection. *Future*  
767 *Microbiol* 4(3), 279-297. doi: 10.2217/fmb.09.1.
- 768 Papin, J.F., Wolf, R.F., Kosanke, S.D., Jenkins, J.D., Moore, S.N., Anderson, M.P., et al. (2013).  
769 Infant baboons infected with respiratory syncytial virus develop clinical and pathological  
770 changes that parallel those of human infants. *Am J Physiol Lung Cell Mol Physiol*  
771 304(8), L530-539. doi: 10.1152/ajplung.00173.2012.
- 772 Passalacqua, K.D., Lu, J., Goodfellow, I., Kolawole, A.O., Arche, J.R., Maddox, R.J., et al.  
773 (2019). Glycolysis is an intrinsic factor for optimal replication of a norovirus. *mBio* 10(2).  
774 doi: 10.1128/mBio.02175-18.
- 775 Porter, R.K., and Brand, M.D. (1995). Mitochondrial proton conductance and H<sup>+</sup>/O ratio are  
776 independent of electron transport rate in isolated hepatocytes. *Biochem J* 310 ( Pt 2),  
777 379-382. doi: 10.1042/bj3100379.
- 778 Rezinciuc, S., Bezavada, L., Bahadoran, A., Dan, S., Wang, R., Ferrer, D.L., et al. (2020).  
779 Dynamic metabolic reprogramming in dendritic cells: an early response to influenza  
780 infection that is essential for effector function. 2020.2001.2014.906826. doi:  
781 10.1101/2020.01.14.906826 %J bioRxiv.
- 782 Sanchez, E.L., and Lagunoff, M. (2015). Viral activation of cellular metabolism. *Virology* 479-  
783 480, 609-618. doi: 10.1016/j.virol.2015.02.038.
- 784 Schmidt, M.E., and Varga, S.M. (2017). Modulation of the host immune response by respiratory  
785 syncytial virus proteins. *J Microbiol* 55(3), 161-171. doi: 10.1007/s12275-017-7045-8.
- 786 Sharp, S.E., Gelfand, M.J., and Shulkin, B.L. (2008). PET/CT in the Evaluation of  
787 Neuroblastoma. *PET Clin* 3(4), 551-561. doi: 10.1016/j.cpet.2009.03.006.
- 788 Sharp, S.E., Gelfand, M.J., and Shulkin, B.L. (2011). Pediatrics: diagnosis of neuroblastoma.  
789 *Semin Nucl Med* 41(5), 345-353. doi: 10.1053/j.semnuclmed.2011.05.001.
- 790 Simoes, E.A., DeVincenzo, J.P., Boeckh, M., Bont, L., Crowe, J.E., Jr., Griffiths, P., et al.  
791 (2015). Challenges and opportunities in developing respiratory syncytial virus  
792 therapeutics. *J Infect Dis* 211 Suppl 1, S1-S20. doi: 10.1093/infdis/jiu828.
- 793 Smallwood, H.S., Duan, S., Morfouace, M., Rezinciuc, S., Shulkin, B.L., Shelat, A., et al. (2017).  
794 Targeting Metabolic Reprogramming by Influenza Infection for Therapeutic Intervention.  
795 *Cell Rep* 19(8), 1640-1653. doi: 10.1016/j.celrep.2017.04.039.
- 796 TeSlaa, T., and Teitell, M.A. (2014). Techniques to monitor glycolysis. *Methods Enzymol* 542,  
797 91-114. doi: 10.1016/B978-0-12-416618-9.00005-4.
- 798 Thomas, D.C. (2017). The phagocyte respiratory burst: Historical perspectives and recent  
799 advances. *Immunol Lett* 192, 88-96. doi: 10.1016/j.imlet.2017.08.016.

800 Vander Heiden, M.G., Cantley, L.C., and Thompson, C.B. (2009). Understanding the Warburg  
801 effect: the metabolic requirements of cell proliferation. *Science* 324(5930), 1029-1033.  
802 doi: 10.1126/science.1160809.

803 Yadava, N., and Nicholls, D.G. (2007). Spare respiratory capacity rather than oxidative stress  
804 regulates glutamate excitotoxicity after partial respiratory inhibition of mitochondrial  
805 complex I with rotenone. *J Neurosci* 27(27), 7310-7317. doi:  
806 10.1523/JNEUROSCI.0212-07.2007.

807 You, D., Marr, N., Saravia, J., Shrestha, B., Lee, G.I., Turvey, S.E., et al. (2013). IL-4Ralpha on  
808 CD4+ T cells plays a pathogenic role in respiratory syncytial virus reinfection in mice  
809 infected initially as neonates. *J Leukoc Biol* 93(6), 933-942. doi: 10.1189/jlb.1012498.

810 Yu, L., Chen, X., Wang, L., and Chen, S. (2018). Oncogenic virus-induced aerobic glycolysis  
811 and tumorigenesis. *J Cancer* 9(20), 3699-3706. doi: 10.7150/jca.27279.

812 Zhou, Y., Pasham, V., Chatterjee, S., Rotte, A., Yang, W., Bhandaru, M., et al. (2015).  
813 Regulation of Na(+)/H(+) Exchanger in Dendritic Cells by Akt1. *Cell Physiol Biochem*  
814 36(3), 1237-1249. doi: 10.1159/000430293.

815  
816  
817  
818  
819  
820  
821  
822  
823  
824  
825  
826  
827  
828  
829  
830  
831  
832

833

Figure 1.JPEG

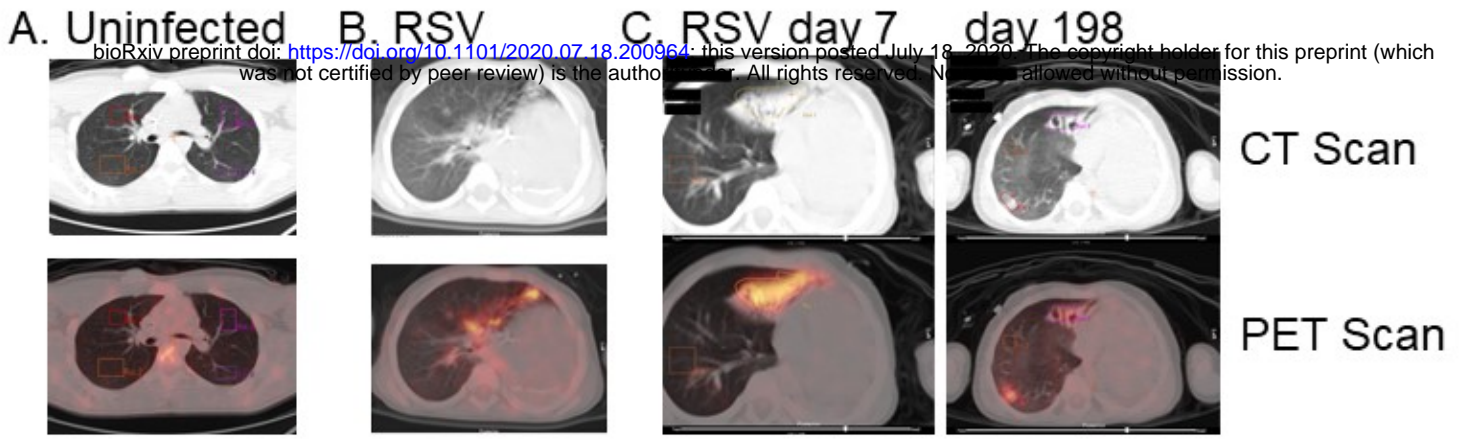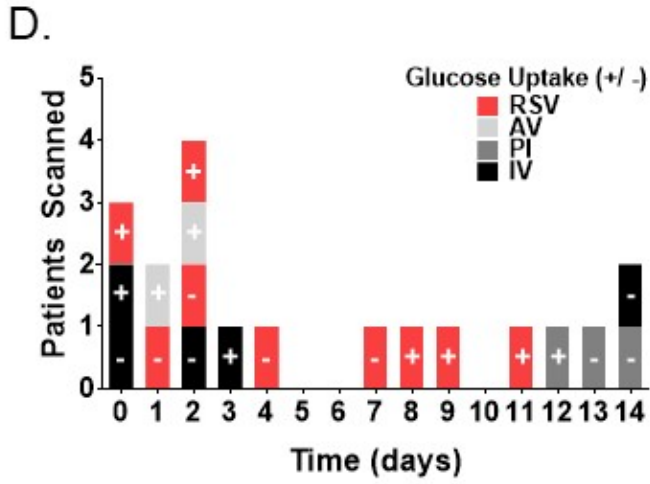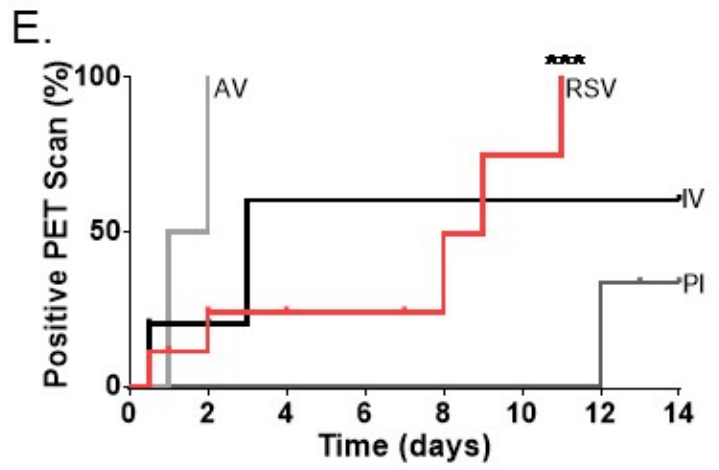

Figure 2.JPEG

bioRxiv preprint doi: <https://doi.org/10.1101/2020.07.18.200964>; this version posted July 18, 2020. The copyright holder for this preprint (which was not certified by peer review) is the author/funder. All rights reserved. No reuse allowed without permission.

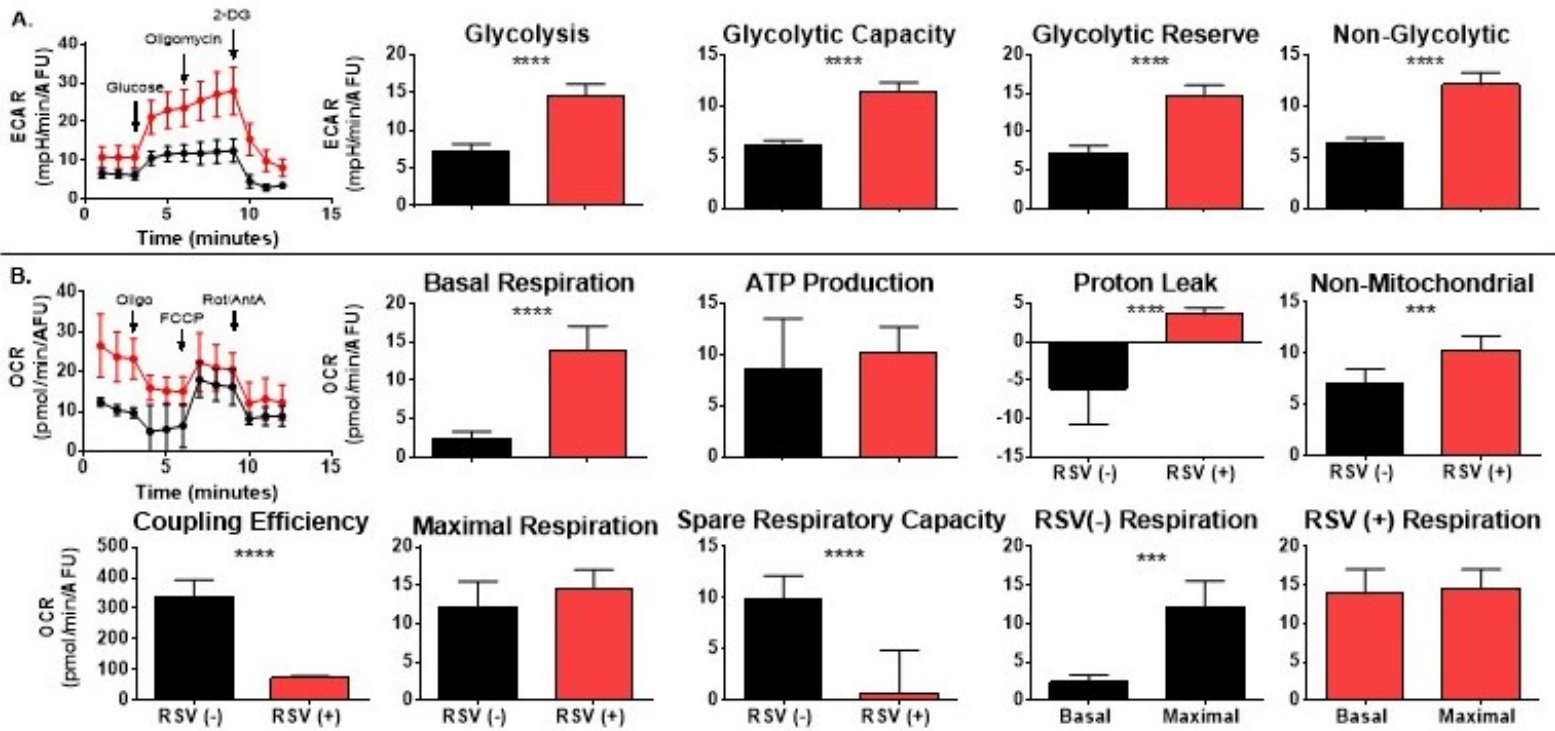



Figure 3.JPEG

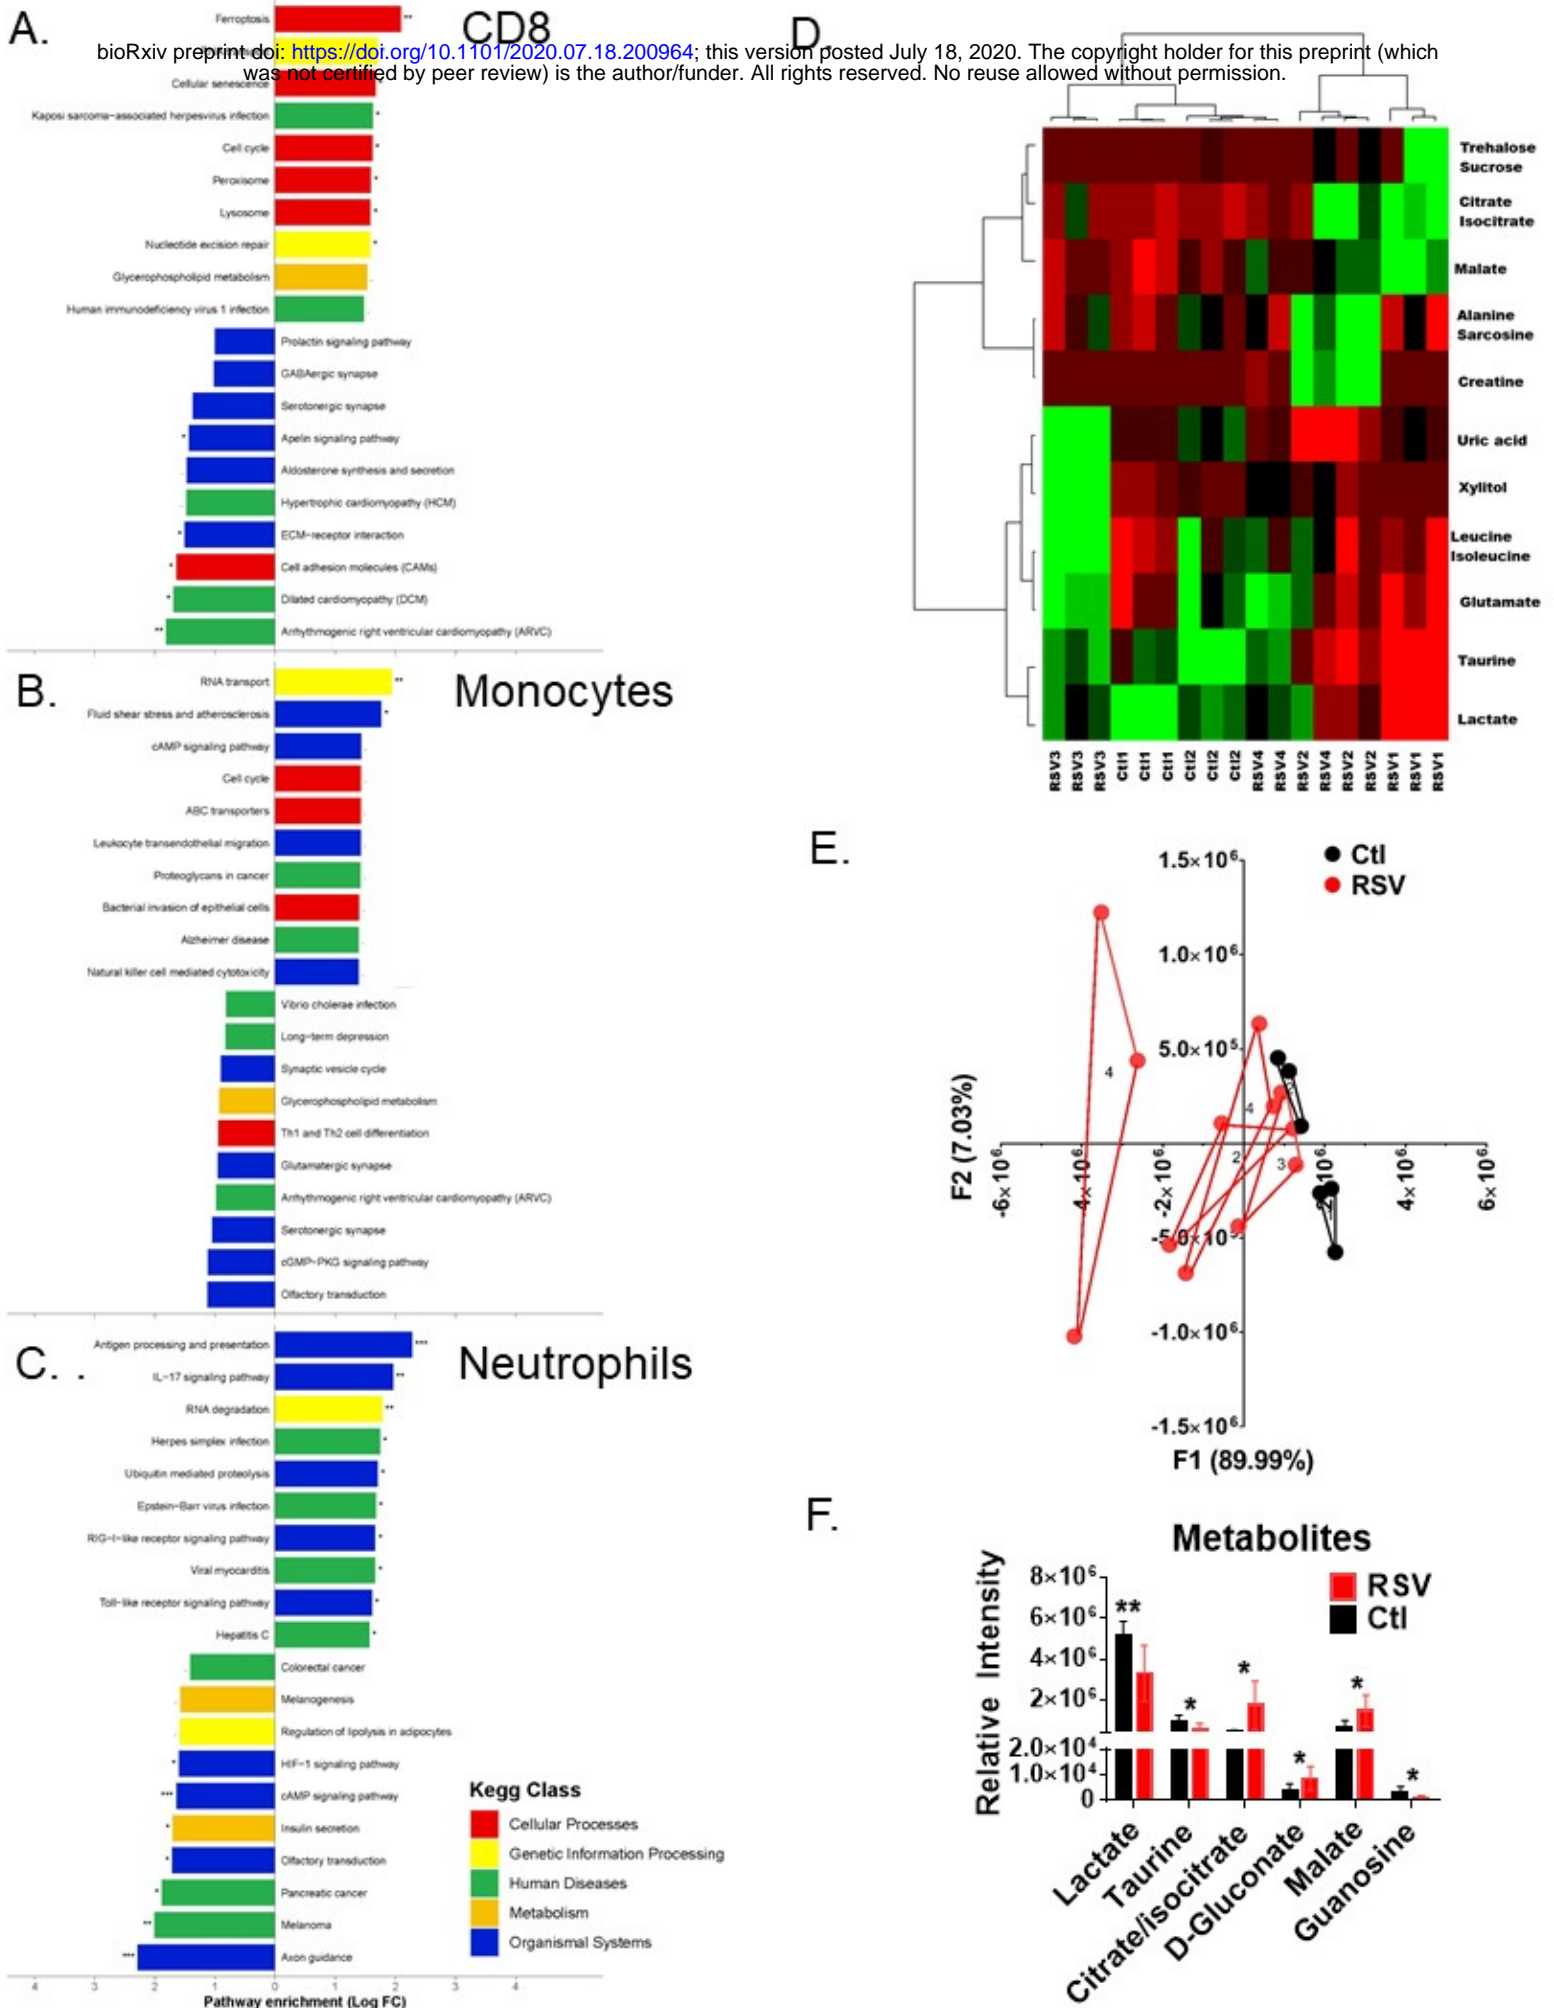

Source: https://biorxiv.org/content/10.1101/2020.07.18.200964v1.full.pdf
